# Supplementary material for: Improved recovery of cell-cycle gene expression in Saccharomyces cerevisiae from regulatory interactions in multiple omics data
Source: BMC Genomics. 2020 Feb 13;21:159. doi: 10.1186/s12864-020-6554-8 (PMC7020519; doi:10.1186/s12864-020-6554-8)
Supplement: Supplementary file 2 — Additional file 2: TableS2. FFL feature counts and target gene coverage by data set. [file 12864_2020_6554_MOESM2_ESM.xlsx]

## Sheet: Sheet1
TableS2: FFL feature counts and target gene coverage by data set
Counts
Expression Cluster	All	ChIP-Chip	Deletion	PWM	Expert PWM	PBM
G1	300	98	125	266	40	185
S	71	20	36	64	15	51
S/G2	121	34	54	112	30	83
G2/M1	195	72	104	178	41	128
M1/G	113	44	66	99	23	69
Total	800	268	385	719	149	516
Percent Coverage
Expression Cluster	All	ChIP-Chip	Deletion	PWM	Expert PWM	PBM
G1	1	0.326667	0.416667	0.886667	0.133333	0.616667
S	1	0.28169	0.507042	0.901408	0.211268	0.71831
S/G2	1	0.280992	0.446281	0.92562	0.247934	0.68595
G2/M1	1	0.369231	0.533333	0.912821	0.210256	0.65641
M1/G	1	0.389381	0.584071	0.876106	0.20354	0.610619
Total	1	0.335	0.48125	0.89875	0.18625	0.645
